# Supplementary material for: Association between CLOCK Gene Polymorphisms and Insomnia Risk According to Food Groups: A KoGES Longitudinal Study
Source: MDPI journal article supplement (doi:10.3390/nu15102300), 2023-05-13
Supplement: s1 [file s1]

**Supplemental Table S1.** Food groups and the included food items

| <b>Food groups</b> | <b>Included food items</b>                                                                                    |
|--------------------|---------------------------------------------------------------------------------------------------------------|
| Refined grains     | rice, ramen, noodles, dumpling, rice cake, bread, jam, cake, cookie                                           |
| Mixed grains       | whole grain rice with beans, multi-grains, rice roll                                                          |
| Vegetables         | cabbage, spinach, zucchini, seasoned bracken, cucumber, radish, salad, green onion, lettuce, broccoli, tomato |
| Fruits             | strawberry, melon, peach, grape, apple, pear, persimmon, tangerine, banana, orange, kiwi                      |
| Meats              | pork, beef, chicken, egg                                                                                      |
| Seafood            | mackerel, grilled yellow croaker, anchovy, squid, crab, shrimp                                                |
| Milk and dairy     | milk, yogurt, ice cream, cheese                                                                               |
| Beverages          | soy milk, coffee, soft drink, green tea, other beverages                                                      |
